# Supplementary material
Source: ML conference proceedings conference paper supplement (https://www.ecva.net/papers/eccv_2020/papers_ECCV/html/123640239_ECCV_2020_paper.php)
Supplement: Supplementary file 2 [file 123640239-supp.zip › 3188-supp/readme.txt]

Supplemental materials for an ECCV2020 paper "Lensless Imaging with Focusing Sparse URA Masks in Long-Wave Infrared and its Application for Human Detection"

- 3188-video.mp4
  Video illustrating the paper and its results.

- 3188-supp.pdf
  Appendix sections with additional details supporting our paper.
